# Supplementary material
Source: publisher figshare collection journal article supplement (https://karger.figshare.com/ndownloader/files/24182537)
Supplement: Supplementary file 1 [file 24182537]

**Supplementary Table 1.** Final weight gain and average fed plasma glucose levels over the 28 days after balloon arterial injury in rats.

| **Treatment**  **Groups** | **NFC** | **HFC** | **NFR** | **HFR** |
| --- | --- | --- | --- | --- |
| **Weight Gain**  **(g)** | 96 ± 6 | 133 ± 13*** | 98 ± 7 | 129 ± 9*** |
| **Fed Plasma Glucose (mM)** | 7.6 ± 0.1 | 7.9 ± 0.1 | 7.6 ± 0.1 | 7.9 ± 0.2 |

NFC = Normal-Fat Control, n=17; HFC = High-Fat Control, n=9; NFR = Normal-Fat with Resveratrol (RSV), n=17; HFR = High-Fat with RSV, n=8. Data are expressed as mean ± SEM. *** A significant main effect of diet (*P* < 0.001), with no interaction with RSV, on weight gain was found.

**Supplementary Table 2**. Fed plasma insulin, triglyceride and free fatty acid levels at 28 days after balloon arterial injury in rats.

| **Treatment**  **Groups** | **NFC** | **HFC** | **NFR** | **HFR** |
| --- | --- | --- | --- | --- |
| **Insulin**  **(pM)** | 188 ± 37 | 110 ± 12 | 151 ± 26 | 121 ± 30 |
| **Triglycerides**  **(mM)** | 1.33 ± 0.24 | 0.90 ± 0.14 | 1.10 ± 0.21 | 1.81 ± 0.46 |
| **Free Fatty Acids**  **(μM)** | 620 ± 106 | 746 ± 167 | 532 ± 79 | 830 ± 119 |

Fed plasma levels of insulin, triglycerides and free fatty acids 28 days after vessel injury. NFC = Normal-Fat Control, n=10; HFC = High-Fat Control, n=5; NFR = Normal-Fat with Resveratrol (RSV), n=9; HFR = High-Fat with RSV, n=4. No significant main effect of diet or RSV or interaction of diet with RSV was found.

**Supplementary Table 3.** Plasma nitric oxide at 28 days after balloon arterial injury in rats.

| **Treatment**  **Groups** | **NFC** | **HFC** | **NFR** | **HFR** |
| --- | --- | --- | --- | --- |
| **Plasma NO**  **(μM)** | 55.2 ± 9.2 | 41.4 ± 5.9 | 71.6 ± 16.7 | 33.5 ± 4.4 |

NFC = Normal-Fat Control, n=9; HFC = High-Fat Control, n=9; NFR = Normal-Fat with Resveratrol (RSV), n=12; HFR = High-Fat with RSV, n=12. Data are expressed as mean ± SEM. No significant main effect of diet or RSV or interaction of diet with RSV was found.

**Supplementary Table 4.** Final weight gain and average fed plasma glucose levels over the 28 days after femoral wire injury in SIRT1Y/Y and wild type mice.

| **Treatment**  **Groups** | **WT-HFC** | **SIRT1Y/Y-HFC** | **WT-HFR** | **SIRT1Y/Y-HFR** |
| --- | --- | --- | --- | --- |
| **Weight Gain**  **(g)** | 0.2 ± 0.7 | 2.9 ± 0.7 | 0.4 ± 0.8 | 0.4 ± 1 |
| **Fed Plasma Glucose (mM)** | 8.4 ± 0.3 | 8.6 ± 0.2 | 9.2 ± 0.1 | 9.0 ± 0.9 |

WT-HFC = Wild Type mice-High-Fat Control, n=12; SIRT1Y/Y-HFC = mice expressing a catalytically dead SIRT1-HFC, n=8; WT-HFR = WT-High-Fat with Resveratrol (RSV), n=9; SIRT1Y/Y-HFR, n=6. Data are expressed as mean ± SEM. No significant changes induced by RSV were found.

**Supplementary Table 5.** Final weight gain and average fed plasma glucose levels over the 28 days after femoral wire injury in heterozygous SIRT1-null and wild type mice.

| **Treatment**  **Groups** | **WT-HFC** | **SIRT1+/--HFC** | **WT-HFR** | **SIRT1+/--HFR** |
| --- | --- | --- | --- | --- |
| **Weight Gain**  **(g)** | 1.6 ± 0.4 | 1.8 ± 0.9 | 2.8 ± 0.6 | 2.8 ± 0.6 |
| **Fed Plasma Glucose (mM)** | 9.0 ± 0.9 | 9.3 ± 0.7 | 7.9 ± 0.9 | 8.8 ± 0.4 |

WT-HFC = Wild Type mice-High-Fat Control, n=5; SIRT1+/- -HFC= heterozygous SIRT1-null mice-HFC, n=8; WT-HFR = WT-High-Fat with Resveratrol (RSV), n=5; SIRT1+/- -HFR, n=11. Data are expressed as mean ± SEM. No significant changes induced by RSV were found.

**Supplementary Table 6.** Final weight gain and average fed plasma glucose levels over the 28 days after femoral wire injury in AMPKα2-null and wild type mice.

| **Treatment**  **Groups** | **WT-HFC** | **AMPKα2-/--HFC** | **WT-HFR** | **AMPKα2-/---HFR** |
| --- | --- | --- | --- | --- |
| **Weight Gain**  **(g)** | 1.2 ± 0.5 | 0.5 ± 1.6 | 1.7 ± 0.3 | 0.8 ± 0.5 |
| **Fed Plasma Glucose (mM)** | 8.8 ± 0.5 | 9.4 ± 0.7 | 9.7 ± 0.7 | 8.6 ± 0.8 |

WT-HFC = Wild Type mice-High-Fat Control, n=5; AMPKα2-/--HFC= AMPKα2-null mice-HFC, n=5; WT-HFR = WT-High-Fat with Resveratrol (RSV), n=4 for weight gain, n=5 for fed plasma glucose; AMPKα2-/- -HFR, n=5. Data are expressed as mean ± SEM. No significant changes induced by RSV were found.

**Supplementary Table 7.** Plasma nitric oxide at 28 days after femoral wire injury in SIRTY/Y, SIRT+/- , AMPKα2(-/-) mice and their respective wild type mice.

**A.**

| **Treatment**  **Groups** | **WT-HFC** | **SIRT1Y/Y-HFC** | **WT-HFR** | **SIRT1Y/Y-HFR** |
| --- | --- | --- | --- | --- |
| **Plasma NO (μM)** | 14.0 ± 1.9 | 12.7 ± 2.2 | 16.3 ± 1.8 | 15.9 ± 4.9 |

WT-HFC = Wild Type mice-High-Fat Control, n=13; SIRT1Y/Y-HFC = mice expressing a catalytically dead SIRT1-HFC, n=12; WT-HFR = WT-High-Fat with Resveratrol (RSV), n=9; SIRT1Y/Y-HFR, n=7. Data are expressed as mean ± SEM. No significant changes induced by RSV were found.

**B.**

| **Treatment**  **Groups** | **WT-HFC** | **SIRT1+/--HFC** | **WT-HFR** | **SIRT1+/--HFR** |
| --- | --- | --- | --- | --- |
| **Plasma NO (μM)** | 16.6 ± 3.3 | 13.3 ± 1.5 | 12.9 ± 1.8 | 12.1 ± 1.9 |

WT-HFC = Wild Type mice-High-Fat Control, n=8; SIRT1+/- -HFC= heterozygous SIRT1-null mice-HFC, n=10; WT-HFR = WT-High-Fat with Resveratrol (RSV), n=5; SIRT1+/- -HFR, n=6. Data are expressed as mean ± SEM. No significant changes induced by RSV were found.

**C.**

| **Treatment**  **Groups** | **WT-HFC** | **AMPKα2-/--HFC** | **WT-HFR** | **AMPKα2-/--HFR** |
| --- | --- | --- | --- | --- |
| **Plasma NO (μM)** | 35.6 ± 5.5 | 35.0 ± 7.1 | 27.4 ± 3.0 | 28.6 ± 3.4 |

WT-HFC = Wild Type mice-High-Fat Control, n=10; AMPKα2-/--HFC= AMPKα2-null mice-HFC, n=5; WT-HFR = WT-High-Fat with Resveratrol (RSV), n=9; AMPKα2-/--HFR, n=7. Data are expressed as mean ± SEM. No significant changes induced by RSV were found.

**
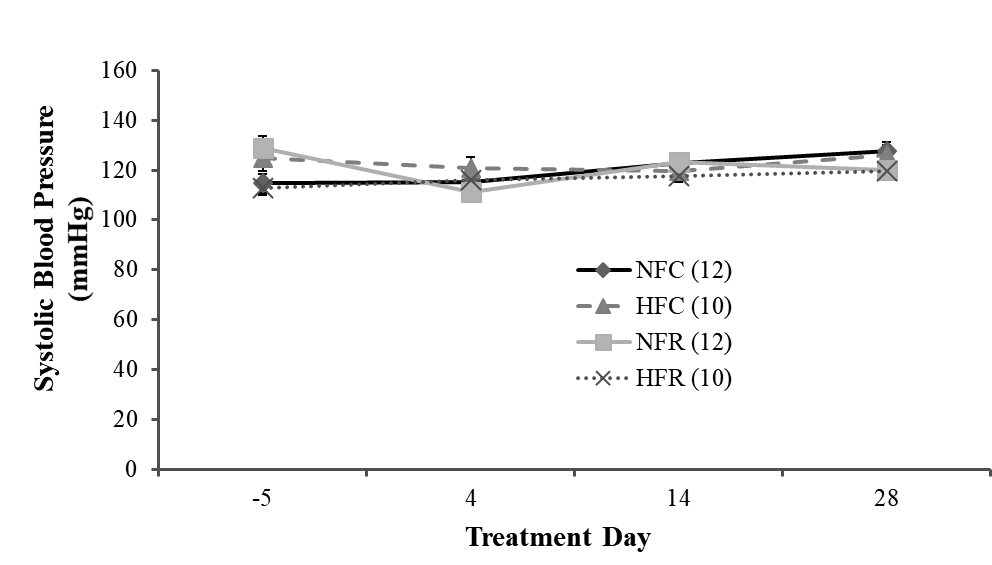
**

**Supplementary Figure 1:** **The effect of resveratrol (RSV) on systolic blood pressure in rats fed a normal- or high-fat diet.** Systolic blood pressures were measured at 3 days before, and 4, 14, and 28 days after carotid arterial injury (corresponding to day 0, 7, 17, and 31 of the treatment, respectively) in rats. NFC = Normal-Fat Control, n=12; HFC = High-Fat Control, n=10; NFR = Normal-fat with RSV, n=12; HFR = High-fat with RSV, n=10. Data are expressed as mean ± SEM. No significant differences induced by diet or RSV were found.


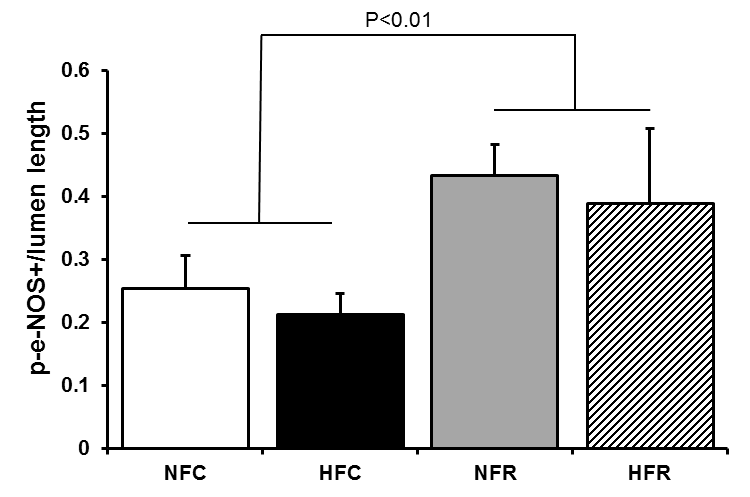

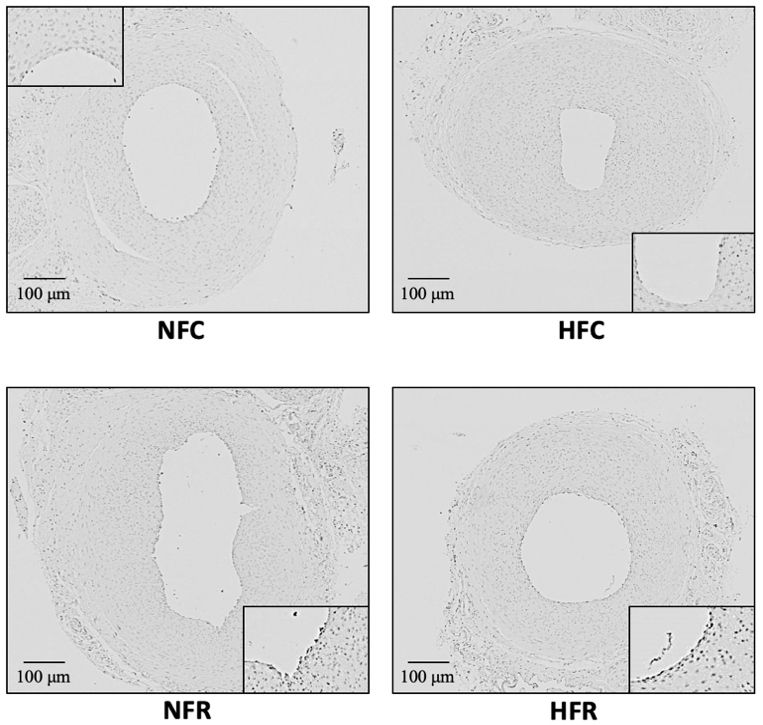


**A**


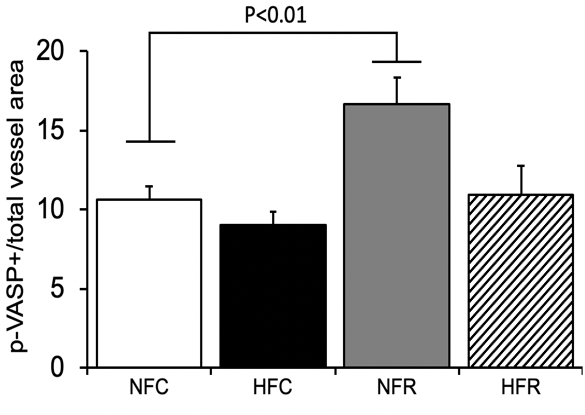

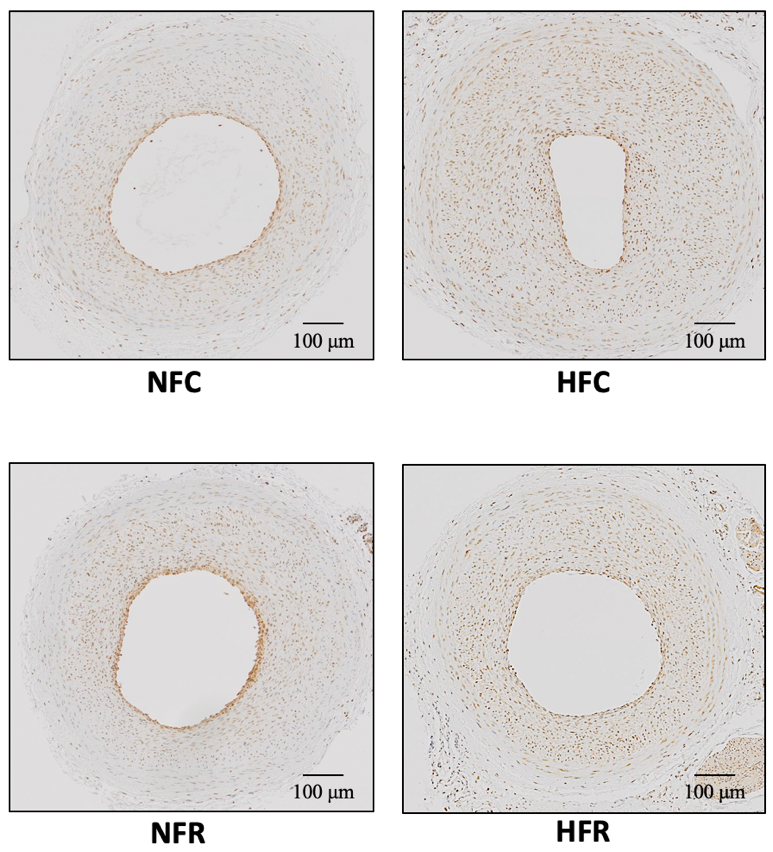


**B**

**Supplementary Figure 2: The effect of resveratrol (RSV) on immunohistochemically determined phosphorylated endothelial nitric oxide synthase (p-eNOS) (A) and phosphorylated vasodilator stimulated phosphoprotein (p-VASP) (B) in rats fed a normal- or high-fat diet.** Representative images (×40) are shown on the left. Inserts are ×400. NFC = Normal-fat control, A: n=15, B=10; HFC = High-fat control, A: n=9, B: n=8; NFR = Normal-fat with RSV, A: n=10, B=12; HFR = High-fat with RSV, A: n=5, B=6. Data are expressed as mean ± SEM**.** A significant main effect of RSV was found in p-eNOS whereas the intergroup differences did not reach significance onBonferroni’s test. In contrast, there was a significant difference between NFC and NFR groups in p-VASP. Both RSV and diet had significant main effects (*P*<0.01 and *P*<0.05 resp., not shown) on p-VASP.


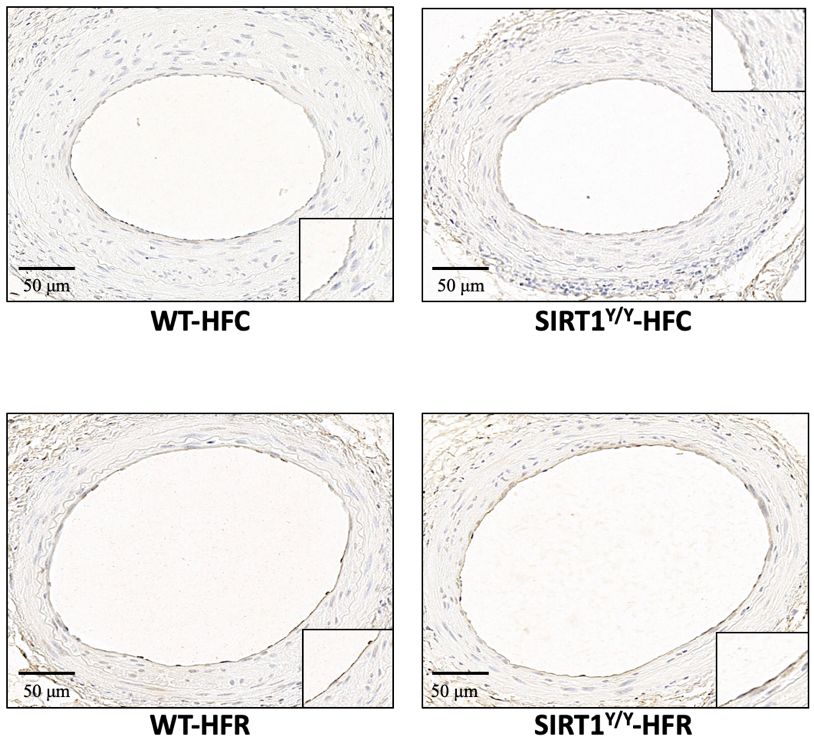


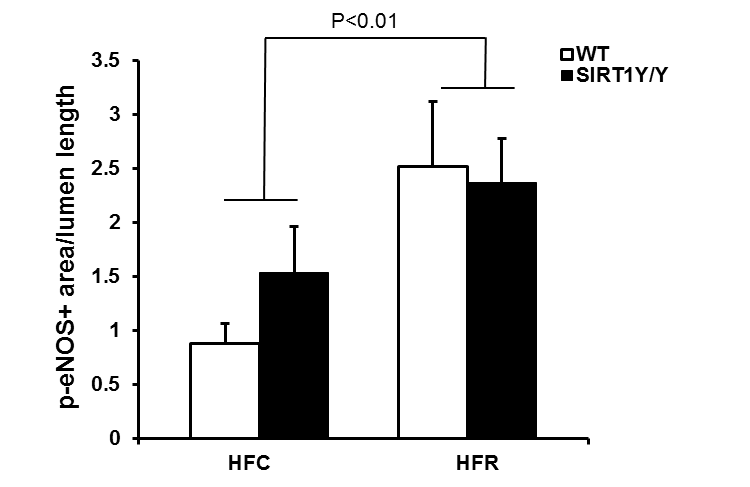


- **WT**
- **SIRT1Y/Y**

**A**

**B**


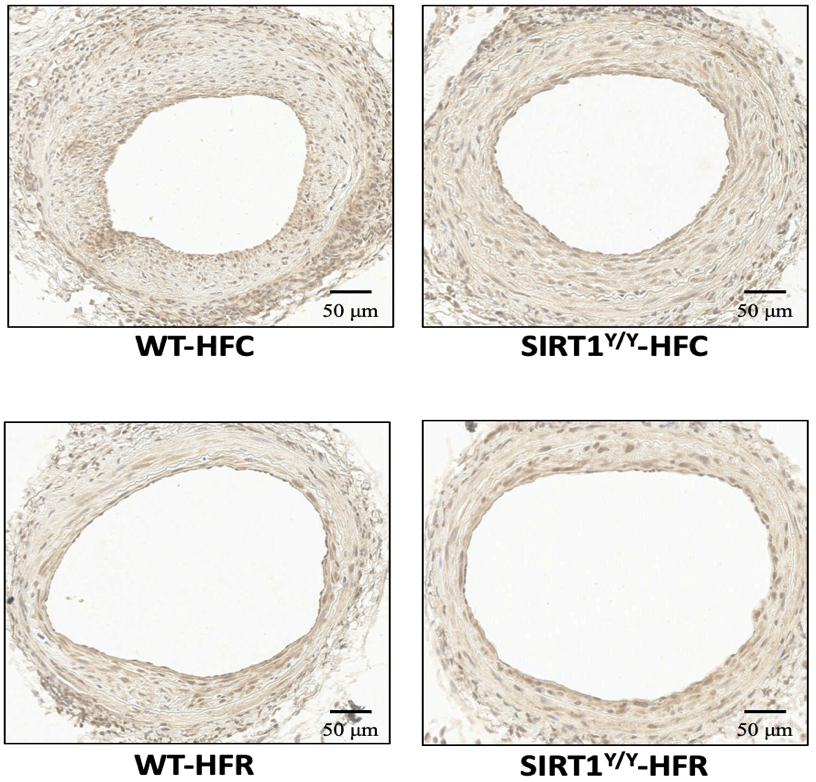


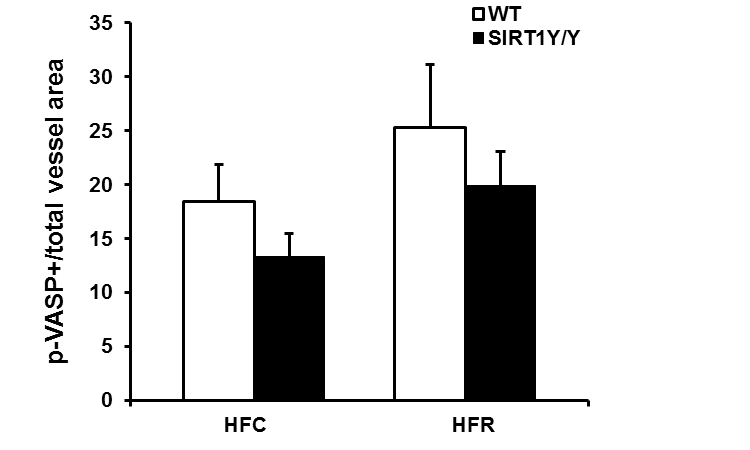


- **WT**
- **SIRT1Y/Y**

**Supplementary Figure 3: The effect of resveratrol (RSV) on immunohistochemically determined phosphorylated endothelial nitric oxide synthase (p-eNOS) (A) and phosphorylated vasodilator stimulated phosphoprotein (p-VASP) (B) in mice expressing a catalytically-inactive SIRT1 (SIRT1Y/Y) and wild type (WT) controls.** Representative images (×200) are shown on the left. Inserts are ×2000. Mice were fed either high-fat diet (HFC, WT: A, n=7, B: n=8;SIRT1Y/Y: A, n=8, B, n=7) or RSV supplemented high-fat diet (HFR, WT: A, n=6, B, n=8;SIRT1Y/Y:A, n=6, B, n=6). Data are expressed as mean ± SEM. A significant main effect of RSV (*P*<0.01) on p-eNOS was found. No significant intergroup differences were found using *post hoc* Bonferroni’s test.

**
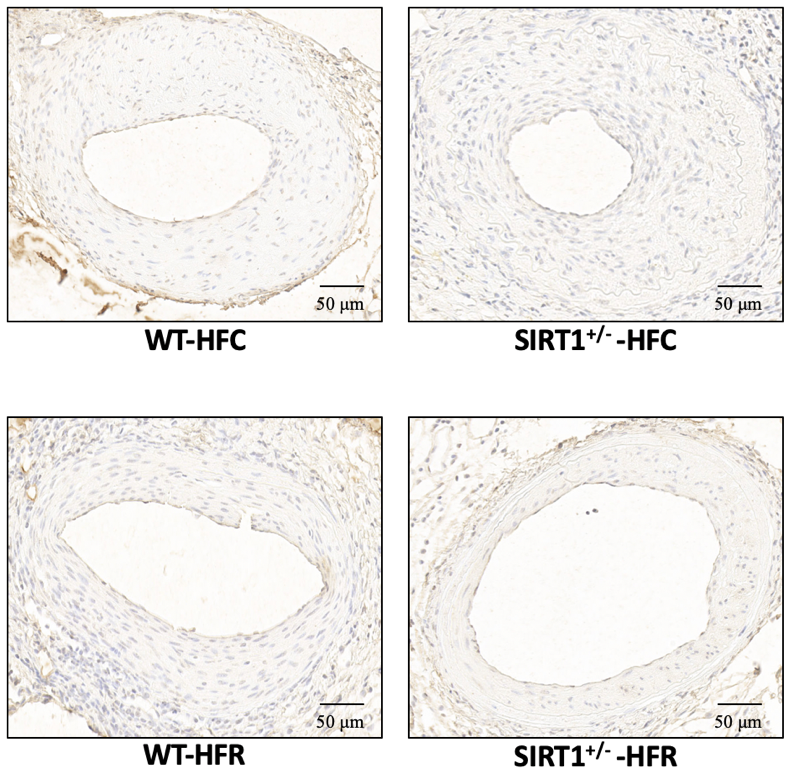
**


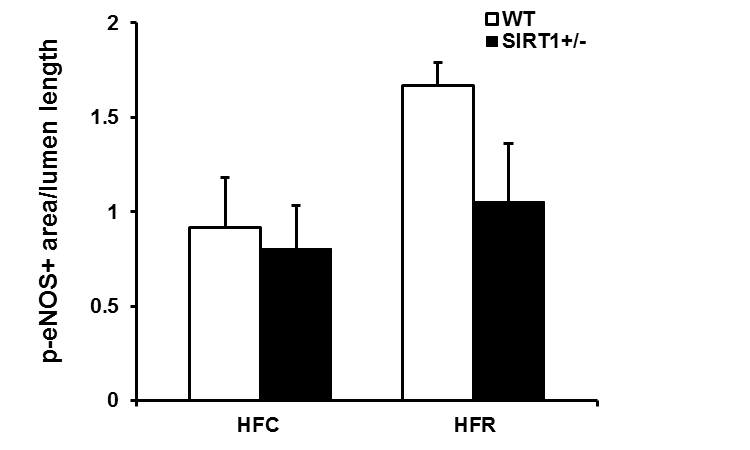


- **WT**
- **SIRT1+/-**

**A**

**B**

**
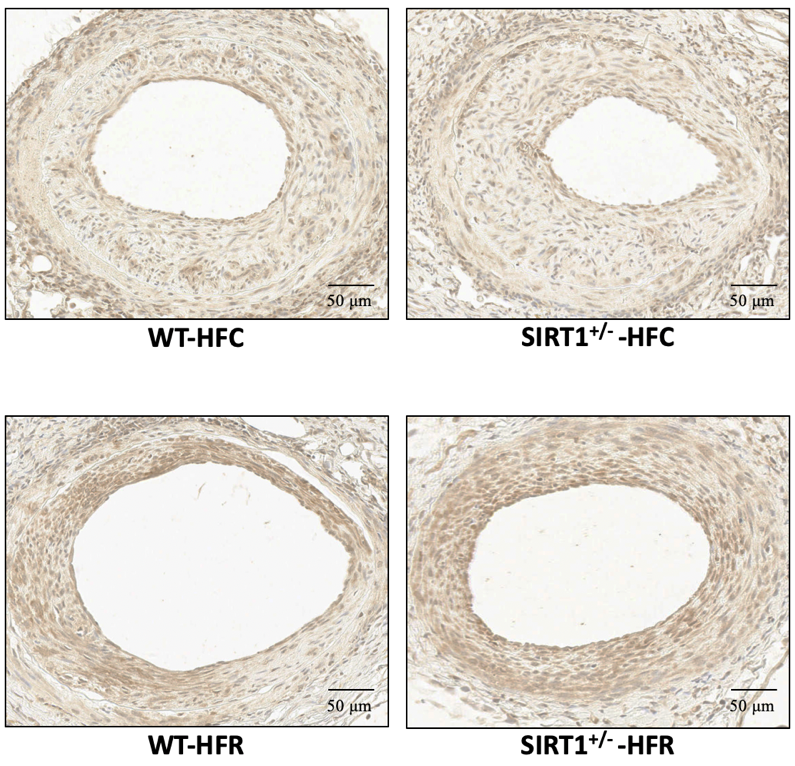
**


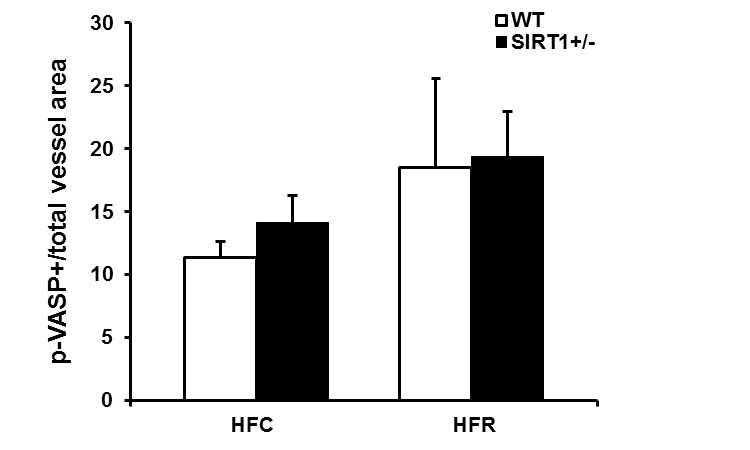


- **WT**
- **SIRT1+/-**

**Supplementary Figure 4: The effect of resveratrol (RSV) on immunohistochemically determined phosphorylated endothelial nitric oxide synthase (p-eNOS) (A) and phosphorylated vasodilator stimulated phosphoprotein (p-VASP) (B) in heterozygous SIRT1-null (SIRT1+/-) mice and wild type (WT) controls.** Representative images are shown on the left. Mice were fed either high-fat diet (HFC, WT: A, n=4, B: n=4;SIRT1+/-: A, n=6, B, n=6) or RSV supplemented high-fat diet (HFR, WT: A, n=6, B, n=4; SIRT1+/-: A, n=6, B, n=9). Data are expressed as mean ± SEM. No significant effects were found.

**
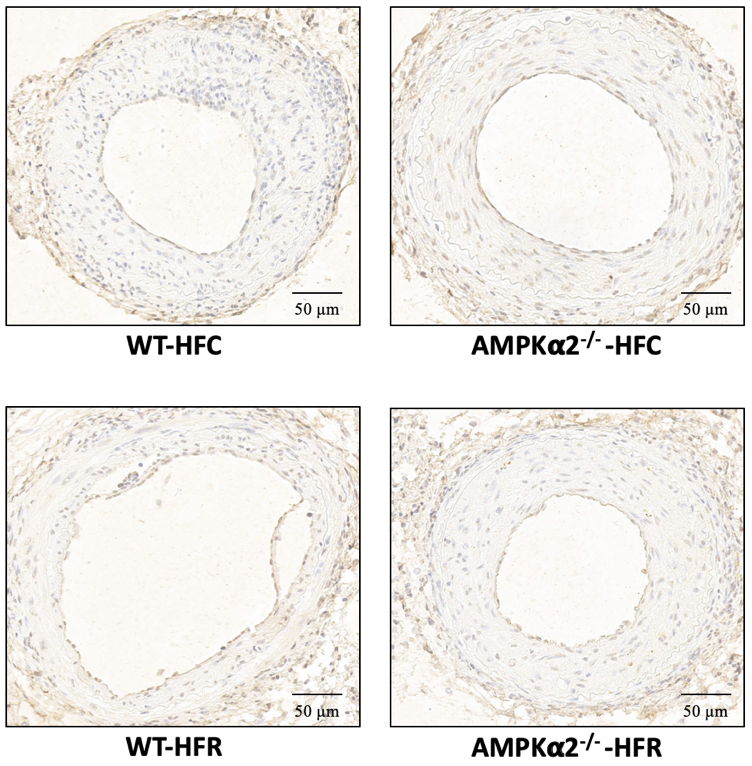
**


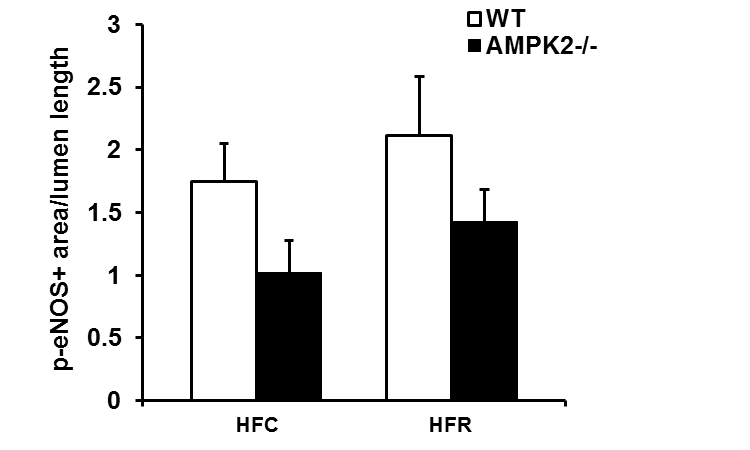


- **WT**
- **AMPKα2-/-**

**A**

**B**

**
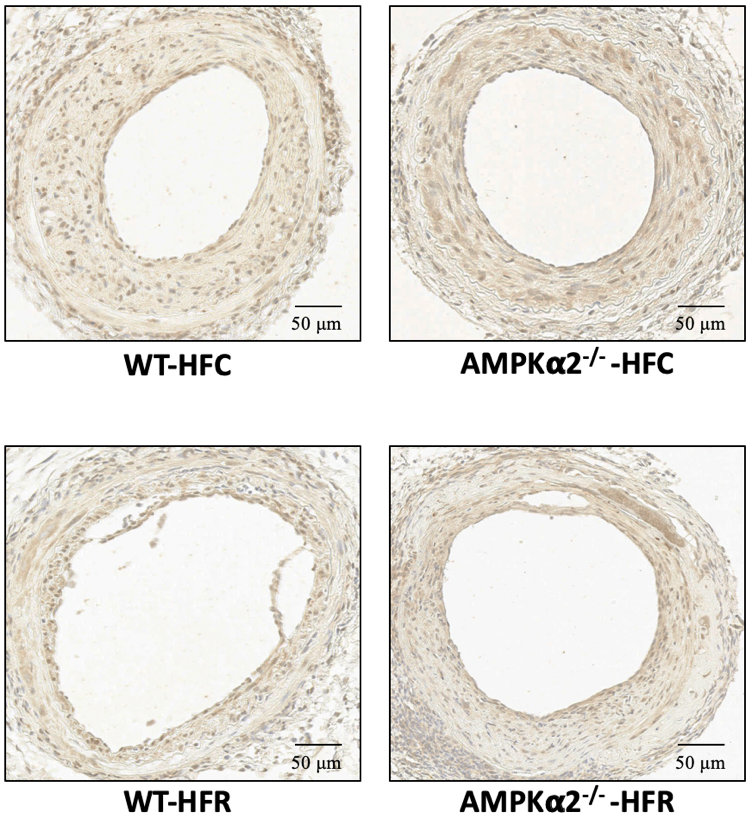
**


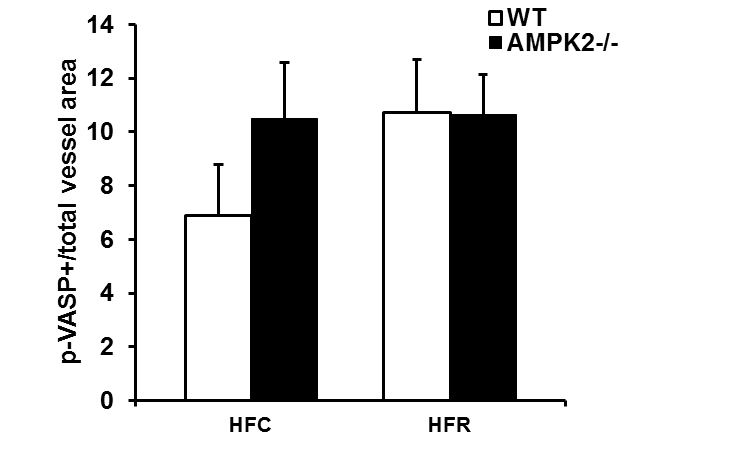


- **WT**
- **AMPKα2-/-**

**Supplementary Figure 5: The effect of resveratrol (RSV) on immunohistochemically determined phosphorylated endothelial nitric oxide synthase (p-eNOS) (A) and phosphorylated vasodilator stimulated phosphoprotein (p-VASP) (B) in AMPKα2-null (AMPKα2-/-) mice and wild type (WT) controls.** Representative images are shown on top. Mice were fed either high-fat diet (HFC, WT: A, n=11, B: n=10;AMPKα2-/-: A, n=5, B, n=5) or RSV supplemented high-fat diet (HFR, WT: A, n=9, B, n=10;AMPKα2-/-: A, n=10, B, n=10). Data are expressed as mean ± SEM. No significant effects were found.
